# Supplementary material for: Study of the Binding of Cuminaldehyde with Bovine Serum Albumin by Spectroscopic and Molecular Modeling Methods
Source: Hindawi journal article supplement (doi:10.1155/2023/4191046), 2023-01-01
Supplement: f1 [file 4191046.f1.docx]

**Supporting Information**

UV–Visible spectra were recorded between the wavelength range of 200 to 400 nm on Perkin-Elmer Lambda 45 Spectrophotometer equipped with autosampler and water-bath with temperature controller. Quartz cuvettes of 1 cm path length were used for the measurements.

Fluorescence measurements were performed on Hitachi spectrofluorometer (Model F 7000) equipped with a PC and programmable temperature controller. Unless stated, the fluorescence spectra were collected at 25 °C with a cell of path length 1 cm. The excitation and emission slits were set at 5 nm. Intrinsic fluorescence was measured by exciting BSA at 295 nm.

The circular dichroism studies of BSA in presence of cuminaldehyde were carried out with JASCO J-815 spectropolarimeter equipped with a Peltier-type temperature controller. The instrument was calibrated with d-10-camphorsulfonic acid. All the CD spectra were collected in a cell of 2 mm path-length. The scan speed was 100 nm/min and response time of 1 s for all measurements. Each spectrum was the average of 3 scans.

The inner filter effect was corrected using the following equation 1:

(S1)

Where, Fcorr and Fobs are the corrected and observed fluorescence emission intensities, respectively, Aexi and Aemi are the absorbance at the excitation and emission wavelengths, respectively.

**Equation used to calculate thermodynamic parameters:**

van 't Hoff equation is given as:

(S2)

(S3)

where ∆H is enthalpy change, ∆S is entropy change and ∆G is free energy change. R is gas constant and T is temperature in K.

**Molecular docking and molecular dynamics simulation**

The interaction between cuminaldehyde and BSA was elucidated by performing molecular docking using “Glide-2018-4 (Schrodinger, LLC, NY, USA)” in standard precision (SP) mode. Briefly, the structure cuminaldehyde was sketched in 2D sketcher and its energy was minimized utilizing OPLS3e forcefield. The 3D coordinates of BSA were downloaded from RCSB databank (PDB Id: 3V03) and preprocessed by assigning missing H-atoms, bond orders, and deleting any hetero-atoms. Non-catalytic water molecules were also deleted. A network of H-bonds was created on the protein molecule and energy of the whole system was minimized utilizing OPLS3e forcefield. The analysis and visualization of BSA-cuminaldehyde interaction was performed in “Maestro-2018-4 (Schrodinger, LLC, NY, USA)”.

The stability and dynamics behavior of BSA and cuminaldehyde was evaluated by performing molecular dynamics simulation using “Desmond-2018 (Schrodinger, LLC, NY, USA)” as reported previously. Briefly, the BSA and cuminaldehyde complex was placed at the center of an orthorhombic simulation box, and away from the box boundaries by at least 1 nm. Simulation box was solvated with TIP3P water molecules and counterions were added to neutralize the system. Physiological conditions were mimicked by adding 150 mM NaCl, and the temperature and pressure were maintained at 300 K and 1 bar atmosphere respectively. Temperature and pressure were maintained constant throughout the simulation using Nose-Hoover Chain thermostat and Martyna-Tobias-Klein barostat respectively 2, 3. Before production run, the whole system was minimized (2000 iterations) keeping a convergence criterion of 1 kcal/mol/Å. Molecular dynamics simulation was performed for 100 ns with a time step of 2 fs; and the structure and energy was recorded in the trajectory at every 10 ps. The results were analyzed in “Maestro-2018 (Schrodinger, LLC, NY, USA)”.

**Fig. S1.** Observed fluorescence emission spectra of BSA at 25 °C in the absence and presence of cuminaldehyde at the excitation wavelength of 295 nm. [BSA] = 3 µM; [cuminaldehyde] = 0, 20, 40, 60, 80, 100, 120, 140, 100, 180, and 200 µM.

**Fig. S2.** Observed fluorescence emission spectra of BSA at 35 °C in the absence and presence of cuminaldehyde at the excitation wavelength of 295 nm. [BSA] = 3 µM; [cuminaldehyde] = 0, 20, 40, 60, 80, 100, 120, 140, 100, 180, and 200 µM.

**Fig. S3.** Observed fluorescence emission spectra of BSA at 45 °C in the absence and presence of cuminaldehyde at the excitation wavelength of 295 nm. [BSA] = 3 µM; [cuminaldehyde] = 0, 20, 40, 60, 80, 100, 120, 140, 100, 180, and 200 µM.

**Fig. S4.** Observed fluorescence emission spectra of BSA at 55 °C in the absence and presence of cuminaldehyde at the excitation wavelength of 295 nm. [BSA] = 3 µM; [cuminaldehyde] = 0, 20, 40, 60, 80, 100, 120, 140, 100, 180, and 200 µM.

1. Lakowicz, J. R., *Principles of Fluorescence Spectroscopy*. Springer US: 2007.

2. Branka, A. C., Nose-Hoover chain method for nonequilibrium molecular dynamics simulation. *Phys Rev E* **2000,** *61* (5), 4769-4773.

3. Martyna, G. J.; Tobias, D. J.; Klein, M. L., Constant-Pressure Molecular-Dynamics Algorithms. *J Chem Phys* **1994,** *101* (5), 4177-4189.
